# Supplementary material
Source: PubMed Central journal article supplement (PMC3863791)
Supplement: mt2013169x1.pdf [file mt2013169x1.pdf]

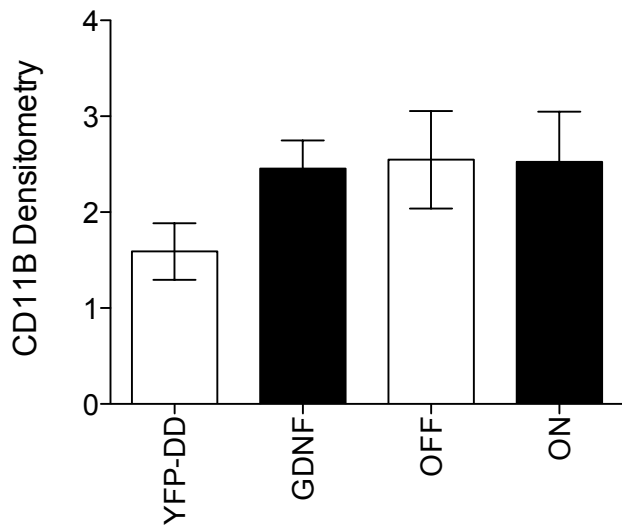

Figure S1- Densitometric analysis of CD11B expression.

To determine if DD regulation leads the increased inflammation in the 6-OHDA model, immunohistochemistry for the leukocyte marker CD11B was performed. Densitometric analysis was subsequently performed using the contralateral uninjected side as control
